# Supplementary material for: Supramolecular liquid crystalline dendrimers with a porphyrin core and functional carboxylic acid dendrons
Source: Royal Society of Chemistry journal article supplement (doi:10.1039/c6ra13604d), 2016-01-01
Supplement: c6ra13604d1.pdf [file c6ra13604d1.pdf]

## Supporting Information

### Supramolecular Liquid Crystalline Dendrimers with a Porphyrin core and Functional Carboxylic Acid Dendrons

*Alberto Concellón<sup>a</sup>, Madalina Bucos<sup>a</sup>, José Luis Serrano<sup>b</sup>, Pilar Romero<sup>a\*</sup>, Mercedes Marcos<sup>a\*</sup>*

| INDEX                                                                                          | page |
|------------------------------------------------------------------------------------------------|------|
| <b>Materials and methods</b>                                                                   | 3    |
| <b>Synthetic procedures and chemical compound information</b>                                  | 4    |
| <b>Scheme S1</b>                                                                               | 5    |
| <b>Table S1.</b> Photophysical data for dendrons and dendrimers                                | 8    |
| <b>Figure S1.</b> <sup>1</sup> H NMR spectrum of complex <b>TPyP-G1A2</b> .                    | 9    |
| <b>Figure S2.</b> <sup>13</sup> C NMR spectrum of complex <b>TPyP-G1A2</b> .                   | 9    |
| <b>Figure S3.</b> <sup>1</sup> H NMR spectrum of complex <b>TPyP-G1APn</b> .                   | 10   |
| <b>Figure S4.</b> <sup>13</sup> C NMR spectrum of complex <b>TPyP-G1APn</b> .                  | 10   |
| <b>Figure S5.</b> <sup>1</sup> H NMR spectrum of complex <b>TPyP-G1ACou</b> .                  | 11   |
| <b>Figure S6.</b> <sup>13</sup> C NMR spectrum of complex <b>TPyP-G1ACou</b> .                 | 11   |
| <b>Figure S7.</b> <sup>1</sup> H NMR spectrum of complex <b>TPyP-G2A4</b> .                    | 12   |
| <b>Figure S8.</b> <sup>13</sup> C NMR spectrum of complex <b>TPyP-G2A4</b> .                   | 12   |
| <b>Figure S9.</b> <sup>1</sup> H NMR spectrum of complex <b>ZnTPyP-G1A2</b> .                  | 13   |
| <b>Figure S10.</b> <sup>13</sup> C NMR spectrum of complex <b>ZnTPyP-G1A2</b> .                | 13   |
| <b>Figure S11.</b> <sup>1</sup> H NMR spectrum of complex <b>ZnTPyP -G1APn</b> .               | 14   |
| <b>Figure S12.</b> <sup>13</sup> C NMR spectrum of complex <b>ZnTPyP-G1APn</b> .               | 14   |
| <b>Figure S13.</b> <sup>1</sup> H NMR spectrum of complex <b>ZnTPyP-G1ACou</b> .               | 15   |
| <b>Figure S14.</b> <sup>13</sup> C NMR spectrum of complex <b>ZnTPyP-G1ACou</b> .              | 15   |
| <b>Figure S15.</b> <sup>1</sup> H NMR spectrum of complex <b>ZnTPyP-G2A4</b> .                 | 16   |
| <b>Figure S16.</b> <sup>13</sup> C NMR spectrum of complex <b>ZnTPyP-G2A4</b> .                | 16   |
| <b>Figure S17.</b> DOSY spectrum of <b>TPyP-G2A4</b>                                           | 17   |
| <b>Figure S18.</b> Job's plot of <b>TPyP-G1A2</b>                                              | 17   |
| <b>Figure S19.</b> <sup>1</sup> H- <sup>1</sup> H NOESY spectrum of complex <b>TPyP-G1A2</b> . | 18   |
| <b>Figure S20.</b> <sup>1</sup> H- <sup>13</sup> C HSQC spectrum of complex <b>TPyP-G1APn</b>  | 18   |

|                                                                                               |    |
|-----------------------------------------------------------------------------------------------|----|
| <b>Figure S21.</b> $^1\text{H}$ - $^{13}\text{C}$ HMBC spectrum of complex <b>TPyP-G1APn.</b> | 19 |
| <b>Figure S22.</b> DSC traces, POM textures and XRD pattern of compound <b>TPyP-G1A2</b>      | 20 |
| <b>Figure S23.</b> DSC traces, POM textures and XRD pattern of compound <b>TPyP-G2A4</b>      | 20 |
| <b>Figure S24.</b> DSC traces, POM textures and XRD pattern of compound <b>ZnTPyP-G1A2</b>    | 21 |
| <b>Figure S25.</b> DSC traces, POM textures and XRD pattern of compound <b>ZnTPyP-G2A4</b>    | 21 |
| <b>Figure S26.</b> UV and FL spectra of building blocks.....                                  | 22 |

## Materials and Methods

Reagents were purchased from Aldrich and were used as received. Anhydrous THF was purchased from Scharlau and dried using a solvent purification system. 5,10,15,20-Tetra(4-pyridyl)porphyrin (**TPyP**) and Zn(II) 5,10,15,20-tetra(4-pyridyl)porphyrin (**ZnTPyP**) were purchased from Frontier Scientific.

The infrared spectra of all the compounds were obtained with a Nicolet Avatar 360 FTIR spectrophotometer in the 400–4000  $\text{cm}^{-1}$  spectral range using KBr pellets and NaCl cells. NMR data were obtained on Bruker AVANCE spectrometers operating at 500, 400 and 300 MHz for  $^1\text{H}$  and 125, 100 and 75 MHz for  $^{13}\text{C}$ . Elemental analyses were performed using a Perkin-Elmer 240C microanalyzer. Mass Spectrometry was performed using a MALDI+/TOF Brüker Microflex system with a DIT + NaFTA matrix and MicroTOF Brüker system for exact mass measurements.

Mesogenic behaviour and transition temperatures were determined using an Olympus DP12 polarizing optical microscope equipped with a Linkam TMS91 hot stage and a CS196 central processor. Differential scanning calorimetry (DSC) experiments were performed on DSC TA Instruments Q-20 and Q-2000 systems. Samples were sealed in aluminium pans and a scanning rate of 10  $^{\circ}\text{C}\cdot\text{min}^{-1}$  under a nitrogen atmosphere was used. The systems were calibrated with indium (156.6  $^{\circ}\text{C}$ ; 28.4  $\text{J}\cdot\text{g}^{-1}$ ) as the standard. Three thermal cycles were carried out. The mesophase transition temperatures were read at the maximum of the corresponding peaks. Thermogravimetric analysis (TGA) was performed on a TA instruments TGA Q5000 at a rate of 10  $^{\circ}\text{C}\cdot\text{min}^{-1}$  under an argon atmosphere.

XRD experiments were performed on a pinhole camera (Anton-Paar) operating with a point-focused Ni-filtered  $\text{Cu-K}\alpha$  beam. Lindemann glass capillaries with 0.9 mm diameter were used to contain the sample and, where necessary, a variable-temperature attachment was used to heat the sample. The patterns were collected on flat photographic film perpendicular to the X-ray beam. Bragg's law was used to obtain the spacing.

UV-vis absorption spectra were measured with a UV4-200 from ATI-Unicam using  $10^{-5}$ – $10^{-6}$  M solutions in  $\text{CH}_2\text{Cl}_2$  (HPLC Grade). Fluorescence spectra were measured with a Perkin Elmer LS50B fluorescence spectrometer using solutions in  $\text{CH}_2\text{Cl}_2$  of ca. 0.01 absorbance (about  $10^{-8}$ – $10^{-9}$  M) under excitation at the absorption maximum



### Synthesis of the dendrons

The synthetic route followed for the preparation of symmetric carboxylic acid dendrons is described by us in *Chem. Eur. J.* 2014, 20, 10027 – 10037.

### General procedure to prepare the hydrogen-bonded dendrimers

To a solution of porphyrin (TPyP or ZnTPyP) in the minimum volume of dry CH<sub>2</sub>Cl<sub>2</sub> was added a solution of the appropriate carboxylic acid dendron in dry CH<sub>2</sub>Cl<sub>2</sub>, in a 1:4 ratio. Solvent was slowly removing under mechanical stirring at room temperature. The samples of the complexes were heated above the clearing temperature and subsequent cooling yielded homogenous materials in all cases.

### Dendrimer TPyP-G1A2 [1]:

Anal. calcd. for C<sub>236</sub>H<sub>258</sub>N<sub>8</sub>O<sub>56</sub>: C, 69.09%; H, 6.34%; N, 2.73%. Found: C, 69.21%; H, 6.43%; N, 2.53%.

<sup>1</sup>H NMR (500 MHz, C<sub>2</sub>D<sub>2</sub>Cl<sub>4</sub>, 25°C, TMS) δ 9.10-9.03 (m, 8H), 8.85 (s, 8H), 8.26-8.19 (m, 8H), 8.08-8.00 (m, 16H), 7.10-7.03 (m, 16H), 7.00- 6.77 (m, 32H), 4.32 (ABq, 16H), 4.11-3.85 (m, 32H), 2.45 (m, 16H), 1.93-1.64 (m, 48H), 1.48 (m, 16H), 1.35-1.29 (m, 12H), 0.98 (t, *J* = 7.4 Hz, 24H), -2.99 (s, 2H). The shift of -COOH it is a low intensity broad peak and overlap to other signals. <sup>13</sup>C NMR (125 MHz, C<sub>2</sub>D<sub>2</sub>Cl<sub>4</sub>, 25°C, TMS) δ 175.80, 172.84, 165.13, 163.24, 156.29, 150.59, 146.92, 144.05, 131.38, 131.93, 129.53, 122.44, 121.09, 117.31, 114.90, 114.14, 67.85, 67.65, 65.22, 45.79, 33.55, 30.86, 28.38, 21.39, 19.00, 17.79, 13.74.

IR (KBr) (cm<sup>-1</sup>): 3442 (O–H), 3312 (N–H), 2400-2600 (O–H asoc), 1733 (C=O). UV–Vis (CH<sub>2</sub>Cl<sub>2</sub>, 10<sup>-5</sup> mol L<sup>-1</sup>) λ/nm: 416, 456, 515, 549, 589, 645.

### Dendrimer TPyP-G1APn [2]:

Anal. calcd. for C<sub>228</sub>H<sub>218</sub>N<sub>8</sub>O<sub>40</sub>: C, 73.81%; H, 5.92%; N, 3.02%. Found: C, 72.99%; H, 6.40%; N, 2.71%

<sup>1</sup>H NMR (500 MHz, CDCl<sub>3</sub>, 25°C, TMS) δ 9.12-8.93 (m, 8H), 8.68 (s, 8H), 8.25 (d, *J* = 9.2 Hz, 4H), 8.17-7.72 (m, 48H), 7.08-6.96 (m, 8H), 6.91-6.75 (m, 16H), 4.53-4.18 (m, 16H), 3.97 (t, *J* = 6.5 Hz, 8H), 3.94-3.76 (m, 8H), 3.34 (t, *J* = 7.8 Hz, 8H), 2.56-2.31 (m, 16H), 2.24-2.10 (m, 8H), 1.94-1.64 (m, 24H), 1.54-1.39 (m, 8H), 1.35-1.29 (m, 12H), 0.98 (t, *J* = 7.4 Hz, 12H), -2.94 (s, 2H). <sup>13</sup>C NMR (125 MHz, CDCl<sub>3</sub>, 25°C, TMS) δ 176.98, 173.13, 173.05, 165.24, 163.38, 156.49, 150.77, 147.18, 144.45, 135.61, 132.10, 131.30, 130.82, 129.91, 129.58, 128.66, 127.39, 127.32, 126.61, 125.74, 125.03, 124.90, 124.80, 124.70, 123.24, 122.45, 121.58, 117.42, 115.02, 114.16, 67.94, 67.70, 65.73, 46.25, 33.77, 32.66, 31.11, 28.59, 21.57, 19.17, 18.14, 13.80.

IR (KBr) (cm<sup>-1</sup>): 3450 (O–H), 3312 (N–H), 2400-2600 (O–H asoc), 1730 (C=O). UV–Vis (CH<sub>2</sub>Cl<sub>2</sub>, 10<sup>-5</sup> mol L<sup>-1</sup>) λ/nm: 266, 277, 314, 328, 344, 416, 512, 547, 587, 642.

### Dendrimer TPyP-G1ACou [3]:

Anal. calcd. for C<sub>204</sub>H<sub>214</sub>N<sub>12</sub>O<sub>48</sub>: C, 68.02%; H, 5.99%; N, 4.67%; found: C, 68.75%; H, 6.53%; N, 5.28%.

<sup>1</sup>H NMR (500 MHz, CDCl<sub>3</sub>, 25°C, TMS) δ 9.13-9.04 (m, 8H), 8.85 (s, 8H), 8.40 (s, 4H), 8.24-8.17 (m, 8H), 8.05-7.97 (m, 8H), 7.35 (d, *J* = 9.0 Hz, 4H), 7.07-7.00 (m, 8H), 6.95-6.80 (m, 16H), 6.59 (dd, *J* = 8.9, 2.4 Hz, 4H), 6.41 (d, *J* = 2.4 Hz, 4H), 4.63-4.36 (2ABq, 16H), 4.16-3.92 (m, 16H), 3.43 (q, *J* = 7.1 Hz, 16H), 2.53-2.39 (m, 8H), 1.89-1.72 (m, 24H), 1.57-1.36 (m, 20H), 1.22 (t, *J* = 7.4 Hz, 24H), 0.98 (t, *J* = 7.4 Hz, 12H), -2.95 (s, 2H). <sup>13</sup>C NMR (101 MHz, CDCl<sub>3</sub>, 25°C, TMS) δ 176.38, 173.04, 165.23, 163.62, 163.36, 158.53, 158.24, 156.55, 153.08, 150.72,

149.36, 147.38, 144.41, 132.10, 131.8 (hsqc), 131.29, 129.62, 125.51, 122.46, 121.55, 117.58, 115.04, 114.14, 109.65, 108.01, 107.66, 96.64, 67.94, 67.78, 66.03, 65.77, 46.36, 45.10, 33.83, 31.12, 30.32, 28.64, 21.62, 19.18, 18.18, 13.82, 12.44.

**IR** (KBr) (cm<sup>-1</sup>): 3312 (N–H), 2600-2700 (O–H), 1732 (C=O). **UV–Vis** (CH<sub>2</sub>Cl<sub>2</sub>, 10<sup>-5</sup> mol L<sup>-1</sup>) λ/nm: 262, 420, 515, 550, 590, 646

#### ***Dendrimer TPyP-G2A4 [4]:***

Anal. calcd. for C<sub>452</sub>H<sub>514</sub>N<sub>8</sub>O<sub>120</sub>: C, 68.04%; H, 6.49%; N, 1.40%. Found: C, 67.27%; H, 7.27%; N, 0.74%

**<sup>1</sup>H NMR** (500 MHz, CDCl<sub>3</sub>, 25°C, TMS) δ 9.11-9.02 (m, 8H), 8.85 (s, 8H), 8.26-8.15 (m, 8H), 8.12-8.00 (m, 32H), 7.06-6.97 (m, 32H), 6.97-6.77 (m, 64H), 4.53- 4.11 (m, 44H), 3.99 (t, *J* = 5.0 Hz, 32H), 4.10-3.83 (m, 32H), 3.74-3.65 (m, 4H), 2.49-3.36 (m, 32H), 1.94-1.64 (m, 96H), 1.56-1.44 (m, 32H), 1.41-1.17 (m, 36H), 0.98 (t, *J* = 7.4 Hz, 48H), -2.94 (s, 2H). The shift of -COOH it is a low intensity broad peak and overlap to other signals. **<sup>13</sup>C NMR** (125 MHz, CDCl<sub>3</sub>, 25°C, TMS) δ 175.42, 174.68, 173.55, 173.40, 172.92, 172.86, 172.38, 172.18, 165.30, 163.41, 156.49, 150.91, 147.14, 144.43, 132.37, 132.16, 129.71, 122.48, 121.54, 117.53, 115.00, 114.41, 114.19, 67.93, 67.71, 65.92, 65.71, 65.62, 65.30, 48.67, 46.54, 46.46, 46.40, 46.31, 33.65, 31.11, 28.62, 21.55, 19.17, 17.86, 17.43, 13.82. (The <sup>13</sup>C signals of dendron focal point (COO, C<sub>q</sub>, CH<sub>3</sub>) appear unfolded).

**IR** (KBr) (cm<sup>-1</sup>): 3312 (N–H), 2400-2600 (O–H asoc), 1733 (C=O). **UV–Vis** (CH<sub>2</sub>Cl<sub>2</sub>, 10<sup>-5</sup> mol L<sup>-1</sup>) λ/nm: 416, 456, 515, 549, 589, 645.

#### ***Dendrimer ZnTPyP-G1A2 [5]:***

Anal. calcd. for C<sub>236</sub>H<sub>256</sub>N<sub>8</sub>O<sub>56</sub>Zn: C, 68.04%; H, 6.19%; N, 2.69%. Found: C, 63.07%; H, 6.28%; N, 2.35%.

**<sup>1</sup>H NMR** (500 MHz, C<sub>2</sub>D<sub>2</sub>Cl<sub>4</sub>, 25°C, TMS) δ 9.4-8.3 (br, 24H), 8.10-8.00 (m, 16H), 7.10-7.02 (m, 16H), 6.97-6.87 (m, 32H), 4.40-4.25 (ABq, 16H), 4.01-3.85 (m, 32H), 2.05-2.38 (m, 16H), 1.86-1.78 (m, 32H), 1.53-1.42 (m, 16H), 1.39-1.29 (m, 12H), 1.26 (d, *J* = 14.4 Hz, 12H), 0.97 (t, *J* = 7.4 Hz, 24H).

**<sup>13</sup>C NMR** (101 MHz, C<sub>2</sub>D<sub>2</sub>Cl<sub>4</sub>, 25°C, TMS) δ 175.75, 172.88, 165.14, 163.24, 156.28, 151.32, 148.74, 146.60, 144.04, 131.93, 131.62, 129.18, 122.43, 121.08, 120.09, 114.89, 114.18, 114.14, 74.37, 73.97, 73.82, 73.78, 73.70, 73.50, 73.42, 67.85, 67.66, 65.28, 45.80, 33.56, 30.86, 28.39, 21.38, 19.00, 17.86, 13.74.

**IR** (KBr) (cm<sup>-1</sup>): 3238 (O–H), 2400-2600 (O–H asoc), 1733 (C=O). **UV–Vis** (CH<sub>2</sub>Cl<sub>2</sub>, 10<sup>-5</sup> mol L<sup>-1</sup>) λ/nm: 262, 419, 450(sh), 577(sh)

#### ***Dendrimer ZnTPyP-G1APn [6]:***

Anal. calcd. for C<sub>228</sub>H<sub>218</sub>N<sub>8</sub>O<sub>40</sub>Zn: C, 72.58%; H, 5.85%; N, 2.96%. Found: C, 71.12%; H, 7.03%; N, 2.23%

**<sup>1</sup>H NMR** (500 MHz, C<sub>2</sub>D<sub>2</sub>Cl<sub>4</sub>, 25°C, TMS) δ 9.1-7.74 (m, 68H), 7.11-6.77 (m, 24H), 4.48-4.19 (m, 16H), 4.01 (t, *J* = 6.5 Hz, 8H), 3.96-3.78 (m, 8H), 3.50-3.22 (m, 8H), 2.63-2.29 (m, 16H), 2.26-2.06 (m, 8H), 1.94-1.64 (m, 24H), 1.58-1.39 (m, 8H), 1.38-1.11 (m, 12H), 0.98 (t, *J* = 7.4 Hz, 12H). **<sup>13</sup>C NMR** (125 MHz, C<sub>2</sub>D<sub>2</sub>Cl<sub>4</sub>, 25°C, TMS) δ 172.97, 165.15, 163.26, 156.25, 151.42, 148.59, 146.54, 144.03, 135.54, 131.95, 130.98, 130.48, 129.88, 129.56, 128.33, 127.24, 126.49, 125.72, 124.74, 124.65, 123.07, 122.40, 121.12, 114.85, 114.16, 74.07, 73.96, 73.80, 73.70, 73.33, 67.85, 67.58, 65.43, 53.59, 45.93, 33.52, 32.40, 30.87, 28.34, 26.47, 22.55, 21.33, 19.01, 17.91, 14.07, 13.75.

**IR** (KBr) ( $\text{cm}^{-1}$ ): 3199 (O–H), 2400-2600 (O–H asoc), 1733 (C=O). **UV–Vis** ( $\text{CH}_2\text{Cl}_2$ ,  $10^{-5}$  mol  $\text{L}^{-1}$ )  $\lambda/\text{nm}$ : 277, 328, 345, 419, 446, 570, 610.

***Dendrimer ZnTPyP-G1ACou [7]:***

Anal. calcd. for  $\text{C}_{204}\text{H}_{212}\text{N}_{12}\text{O}_{48}\text{Zn}$ : C, 66.85%; H, 5.83%; N, 4.59%. Found: C, 65.89%; H, 6.62%; N, 4.15%.

**$^1\text{H}$  NMR** (500 MHz,  $\text{CDCl}_3$ ,  $25^\circ\text{C}$ , TMS)  $\delta$  9.2-7.5 (br, 24H), 8.36 (s, 4H), 8.16-7.99 (m, 8H), 7.32 (d,  $J = 8.9$  Hz, 4H), 7.12-6.82 (m, 24H), 6.58 (dd,  $J = 8.9, 2.4$  Hz, 4H), 6.40 (d,  $J = 2.4$  Hz, 4H), 4.56-4.29 (2ABq, 16H), 4.02 (t,  $J = 6.5$  Hz, 8H), 3.98-3.90 (m, 8H), 3.42 (q,  $J = 7.1$  Hz, 16H), 2.47-2.37 (m, 8H), 1.89-1.72 (m, 24H), 1.53-1.48 (m, 8H), 1.44-1.36 (m, 12H), 1.21 (t,  $J = 7.4$  Hz, 24H), 0.98 (t,  $J = 7.4$  Hz, 12H).  **$^{13}\text{C}$  NMR** (125 MHz,  $\text{CDCl}_3$ ,  $25^\circ\text{C}$ , TMS)  $\delta$  176.40, 172.95, 165.28, 163.60, 163.43, 158.56, 158.21, 156.57, 153.13, 151.68, 149.41, 148.95, 145.59, 144.49, 132.16, 131.72, 131.30, 129.59, 129.27, 122.46, 121.67, 115.40, 115.11, 114.22, 109.68, 108.02, 107.70, 96.68, 77.35, 77.27, 77.03, 76.96, 76.72, 76.64, 67.99, 67.83, 65.95, 65.68, 46.39, 45.11, 33.80, 31.15, 28.65, 21.62, 19.20, 18.10, 13.81, 12.45, 1.03.

**IR** (KBr) ( $\text{cm}^{-1}$ ): 3206 (O–H), 2400-2600 (O–H asoc), 1734 (C=O). **UV–Vis** ( $\text{CH}_2\text{Cl}_2$ ,  $10^{-5}$  mol  $\text{L}^{-1}$ )  $\lambda/\text{nm}$ : 262, 314, 420, 561.

***Dendrimer ZnTPyP-G2A4 [8]:***

Anal. calcd. for  $\text{C}_{452}\text{H}_{512}\text{N}_8\text{O}_{120}\text{Zn}$ : C, 67.50%; H, 6.42%; N, 1.39%. Found: C, 66.50%; H, 6.34%; N, 1.28%.

**$^1\text{H}$  NMR** (500 MHz,  $\text{C}_2\text{D}_2\text{Cl}_4$ ,  $25^\circ\text{C}$ , TMS)  $\delta$  9.4-8.4 (br, 24H), 8.29-7.93 (m, 32H), 7.16-6.83 (m, 96H), 4.39-4.12 (m, 44H), 4.02 (t,  $J = 5.0$  Hz, 32H), 3.99-3.87 (m, 32H), 3.85-3.5 (m, 4H), 2.49-4.31 (m, 32H), 1.94-1.76 (m, 96H), 1.56-1.40 (m, 32H), 1.41-1.17 (m, 36H), 0.97 (t,  $J = 7.5$  Hz, 48H).  **$^{13}\text{C}$  NMR** (125 MHz,  $\text{C}_2\text{D}_2\text{Cl}_4$ ,  $130^\circ\text{C}$ , TMS)  $\delta$  172.08, 171.68, 164.65, 163.40, 156.45, 150.74, 149.10, 146.46, 144.92, 131.76, 131.73, 128.80, 122.08, 121.77, 115.43, 114.46, 68.27, 68.14, 65.90, 65.29, 46.67, 46.15, 33.44, 30.95, 28.54, 21.34, 18.81, 17.35, 17.19, 16.97, 13.17.

**IR** (KBr) ( $\text{cm}^{-1}$ ): 3100-3040 (O–H), 2400-2600 (O–H asoc), 1735 (C=O). **UV–Vis** ( $\text{CH}_2\text{Cl}_2$ ,  $10^{-5}$  mol  $\text{L}^{-1}$ )  $\lambda/\text{nm}$ : 262, 337, 439, 573, 615.

## 2. Supporting Tables

**Table S1.** Photophysical data for dendrons and dendrimers

| Compound             | Absorbance $\lambda_{\text{abs}}$ (nm)              |                                                     | Florescence $\lambda_{\text{em}}$ (nm) |
|----------------------|-----------------------------------------------------|-----------------------------------------------------|----------------------------------------|
|                      | Solution <sup>[a]</sup>                             | Film                                                | Solution <sup>[b]</sup>                |
| <b>Ac-G1APn</b>      | 266, 277, 314, 328, 344                             | 266, 289, 300, 352, 369                             | 377, 399                               |
| <b>TPyP-G1APn</b>    | 266, 277, 314, 328, 344,<br>416, 512, 547, 587, 642 | 266, 277, 314, 328, 344,<br>416, 512, 547, 587, 645 | 377, 398, 418                          |
| <b>ZnTPyP-G1APn</b>  | 277, 328, 345, 419, 446,<br>570, 610                | *                                                   | 377, 397, 418                          |
| <b>Ac-G1ACou</b>     | 262, 424                                            | 262, 417                                            | 458                                    |
| <b>TPyP-G1ACou</b>   | 262, 420, 515, 550, 590,<br>646                     | 262, 424, 516, 550, 592,<br>645                     | 456                                    |
| <b>ZnTPyP-G1ACou</b> | 262, 314, 420, 561                                  | *                                                   | 456                                    |

<sup>[a]</sup>CH<sub>2</sub>Cl<sub>2</sub> solution (10<sup>-5</sup> mol L<sup>-1</sup>). <sup>[b]</sup>CH<sub>2</sub>Cl<sub>2</sub> solution (10<sup>-8</sup> mol L<sup>-1</sup>).



### 3. Supporting Figures

#### NMR Spectra

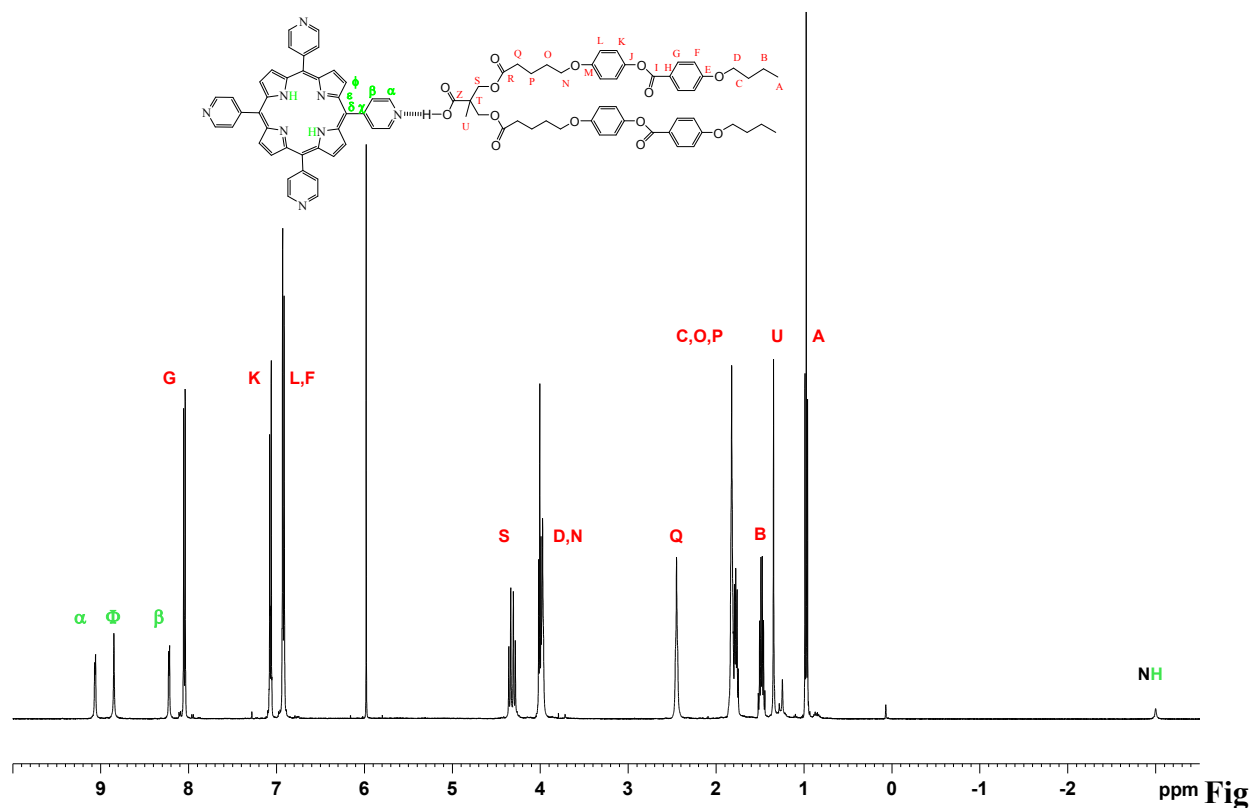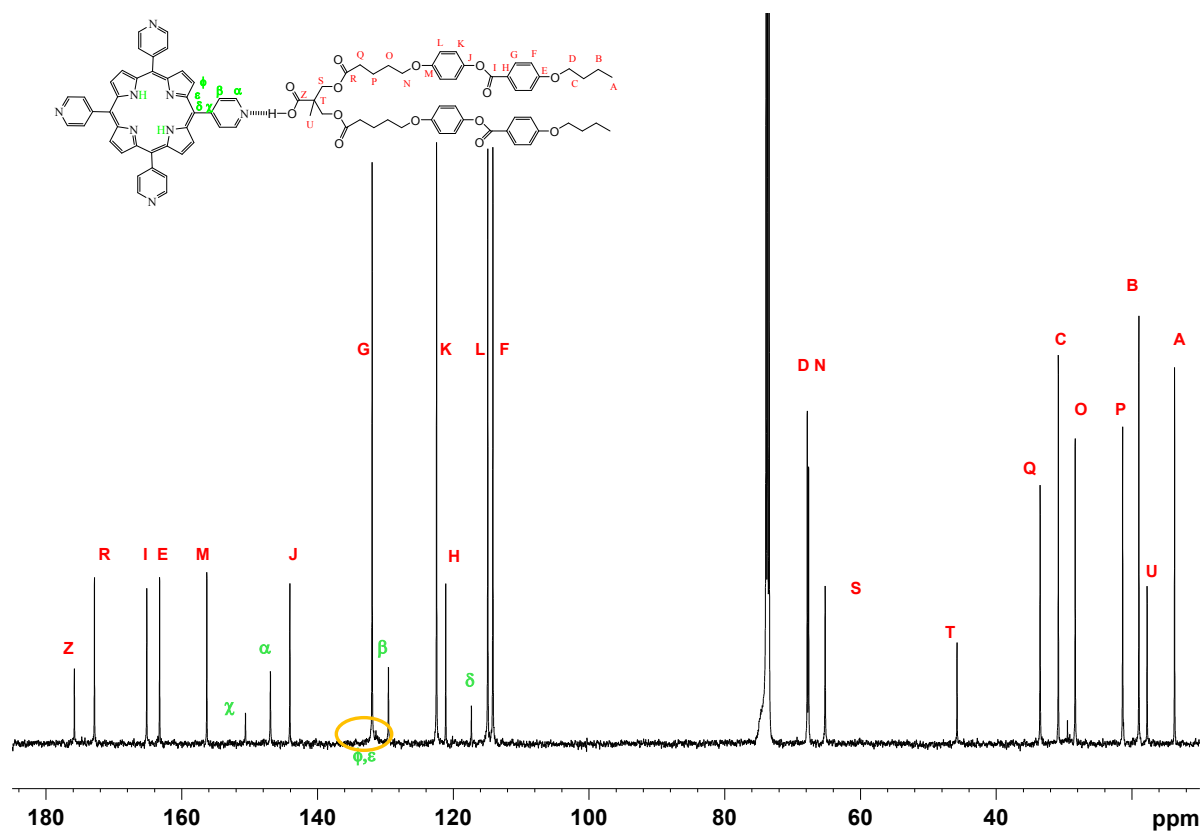

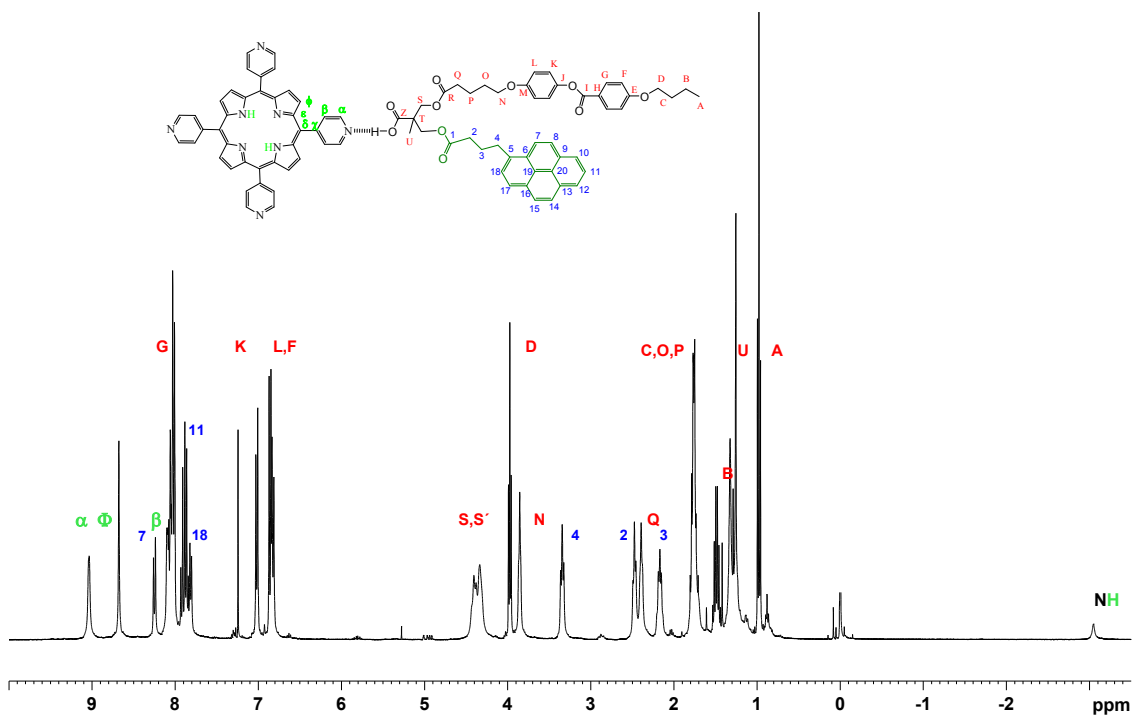

Figure S3.  $^1\text{H}$  NMR spectrum of complex TPYP-G1APn. (500 MHz,  $\text{CDCl}_3$ ,  $25^\circ\text{C}$ )

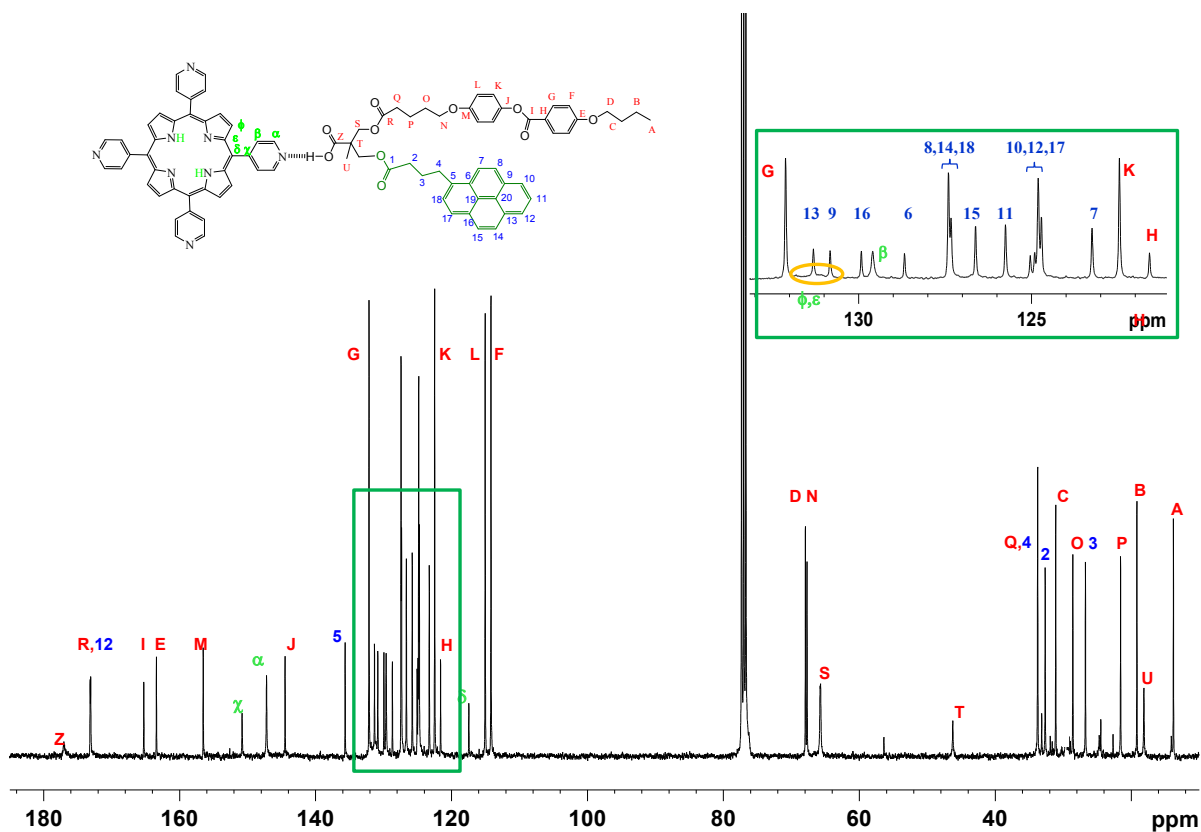

Figure S4.  $^{13}\text{C}$  NMR spectrum of complex TPYP-G1APn. (500 MHz,  $\text{CDCl}_3$ ,  $25^\circ\text{C}$ )

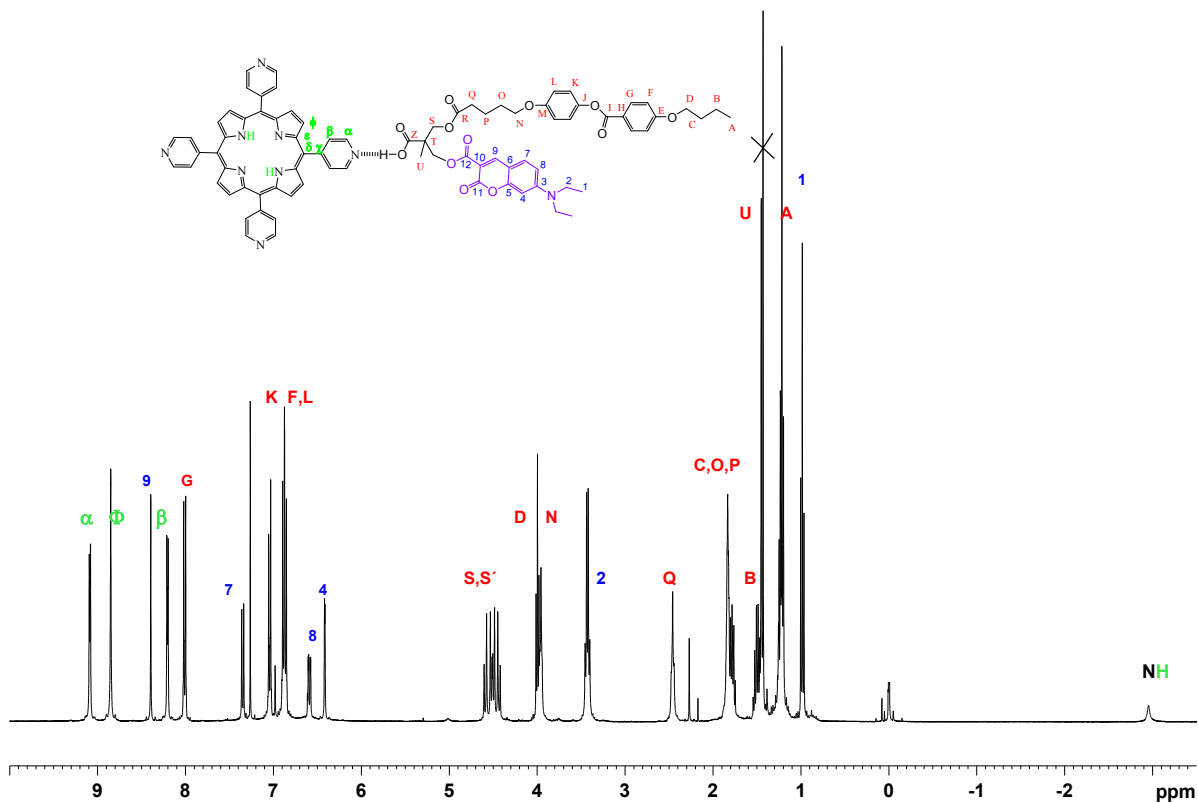

Figure S5.  $^1\text{H}$  NMR spectrum of complex TPyP-G1ACou. (500 MHz,  $\text{CDCl}_3$ ,  $25^\circ\text{C}$ )

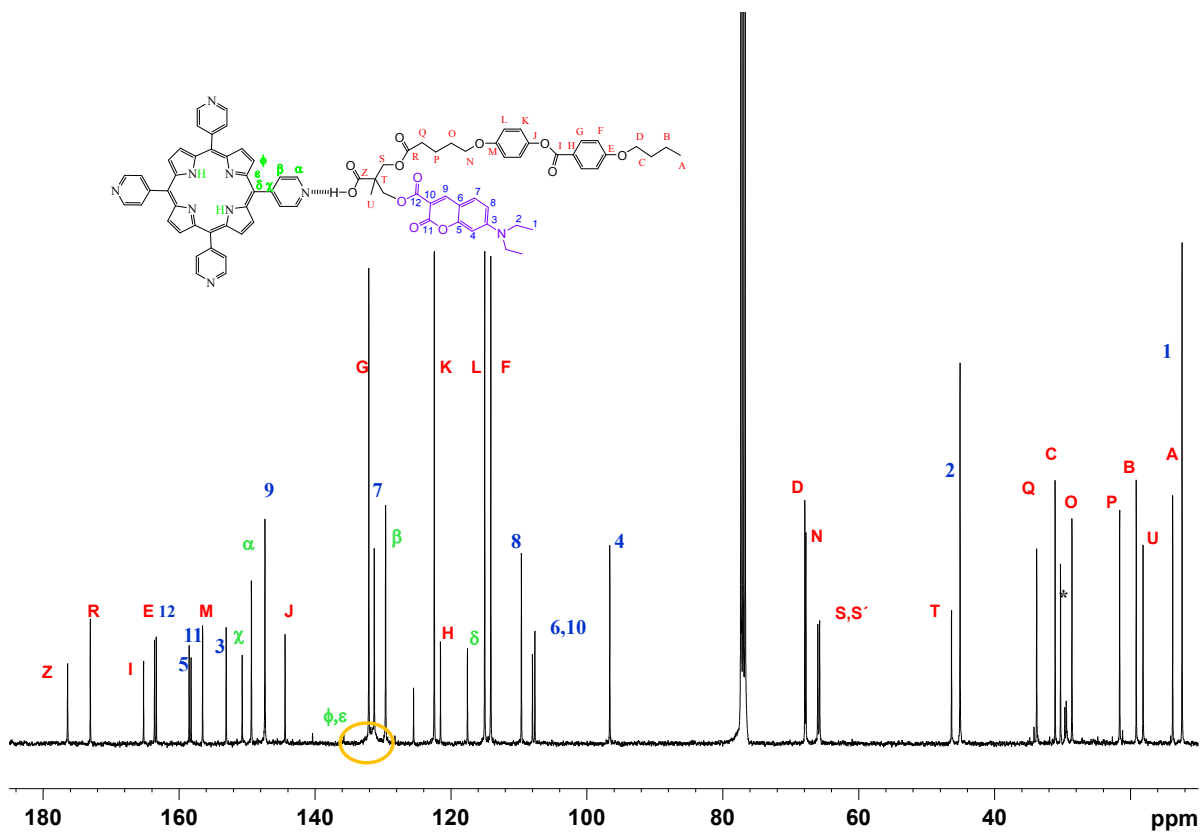

Figure S6.  $^{13}\text{C}$  NMR spectrum of complex TPyP-G1ACou. (500 MHz,  $\text{CDCl}_3$ ,  $25^\circ\text{C}$ )

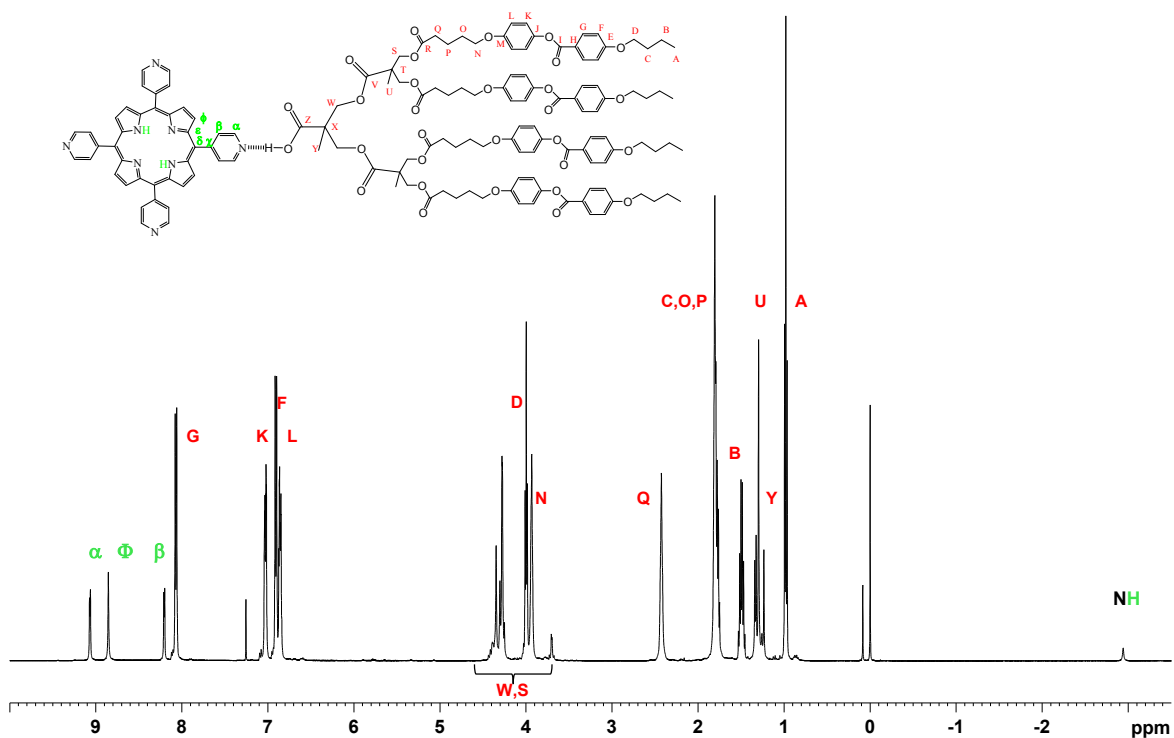

**Figure S7.**  $^1\text{H}$  NMR spectrum of complex **TPyP-G2A4**. (500 MHz,  $\text{CDCl}_3$ ,  $25^\circ\text{C}$ ).

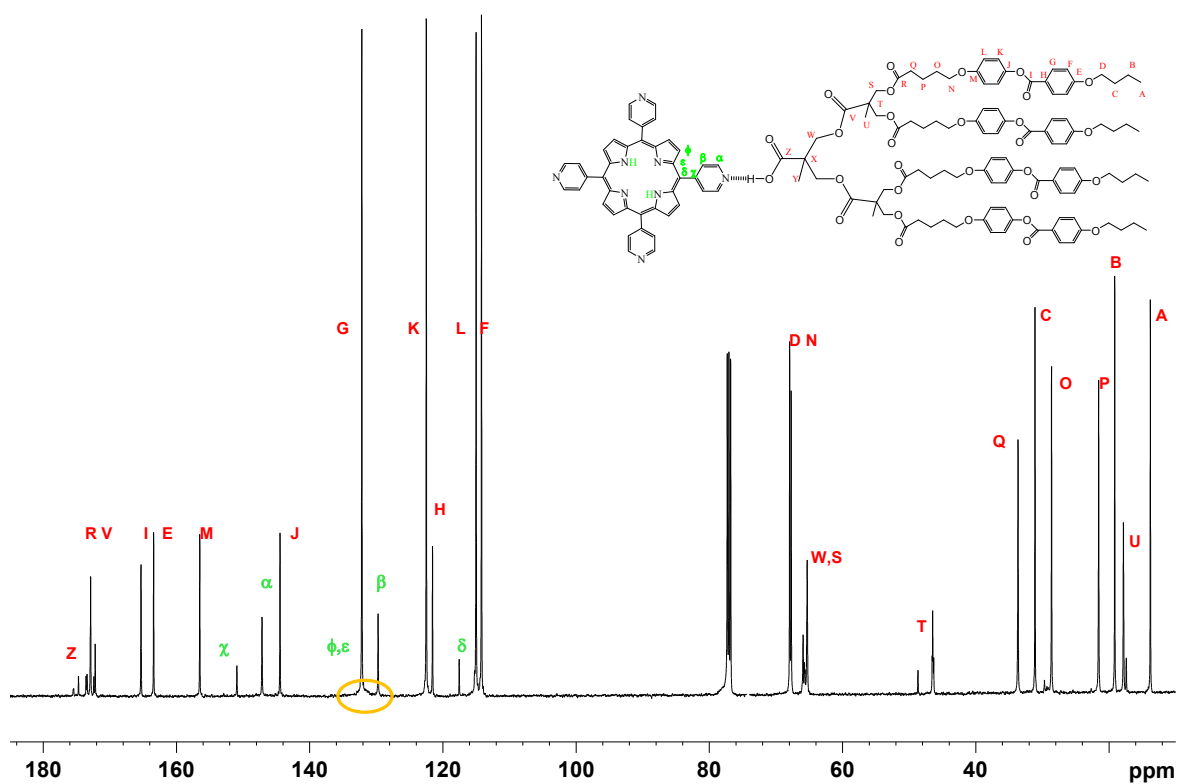

**Figure S8.**  $^{13}\text{C}$  NMR spectrum of complex **TPyP-G2A4**. (500 MHz,  $\text{CDCl}_3$ ,  $25^\circ\text{C}$ )

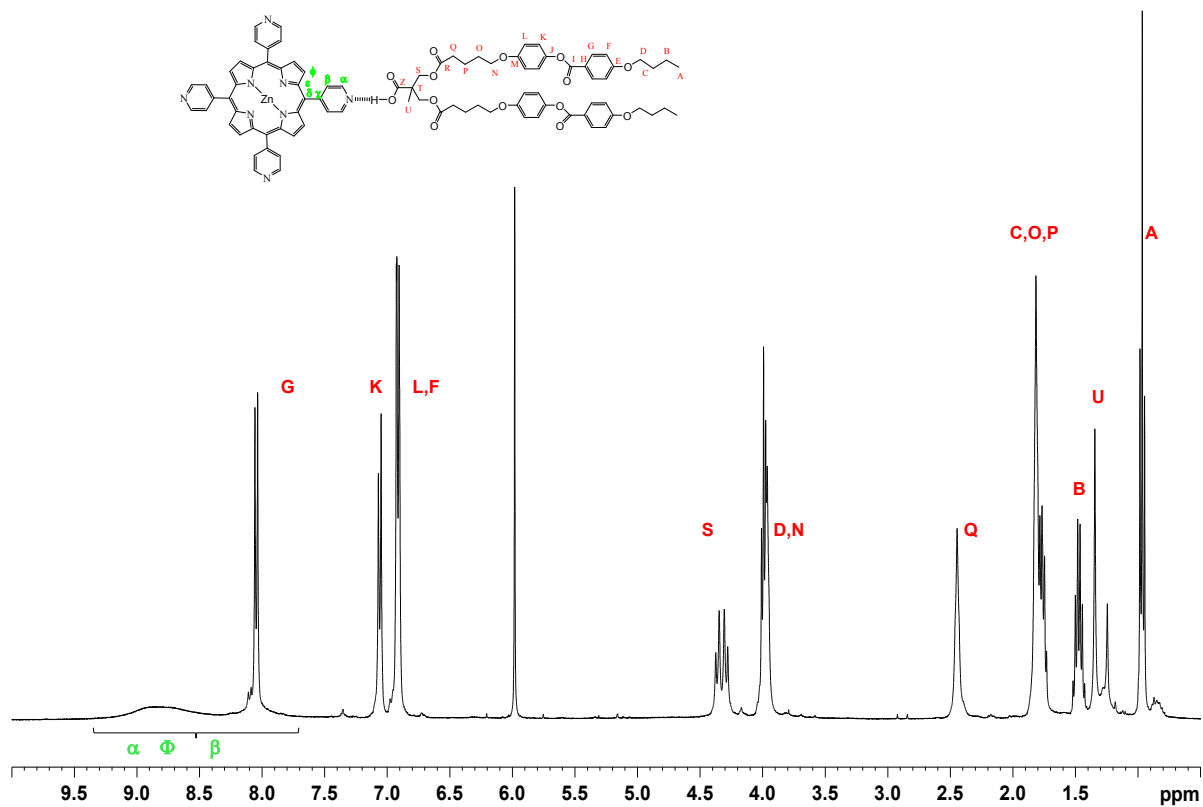

**Figure S9.**  $^1\text{H}$  NMR spectrum of complex ZnTPyP-G1A2. (500 MHz,  $\text{C}_2\text{D}_2\text{Cl}_4$ , 25°C)

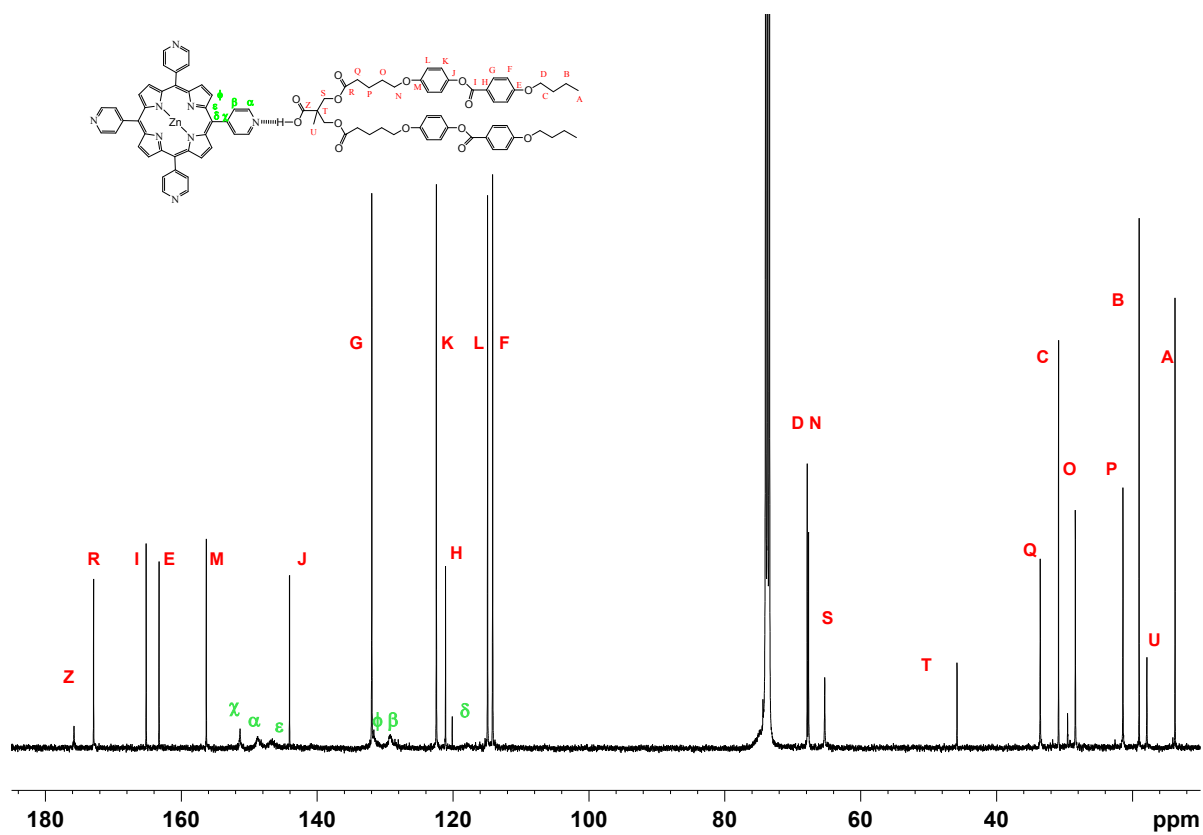

**Figure S10.**  $^{13}\text{C}$  NMR spectrum of complex ZnTPyP-G1A2. (500 MHz,  $\text{C}_2\text{D}_2\text{Cl}_4$ , 25°C)

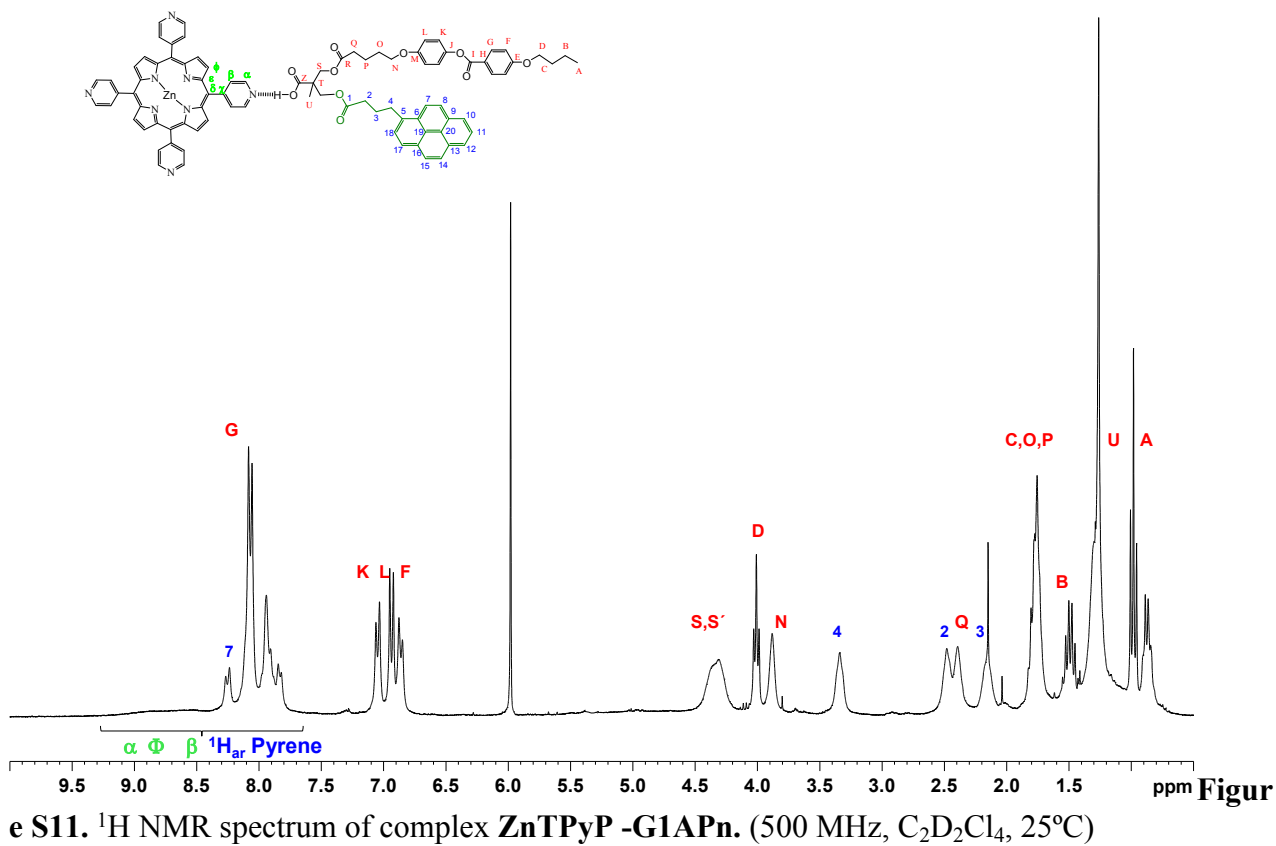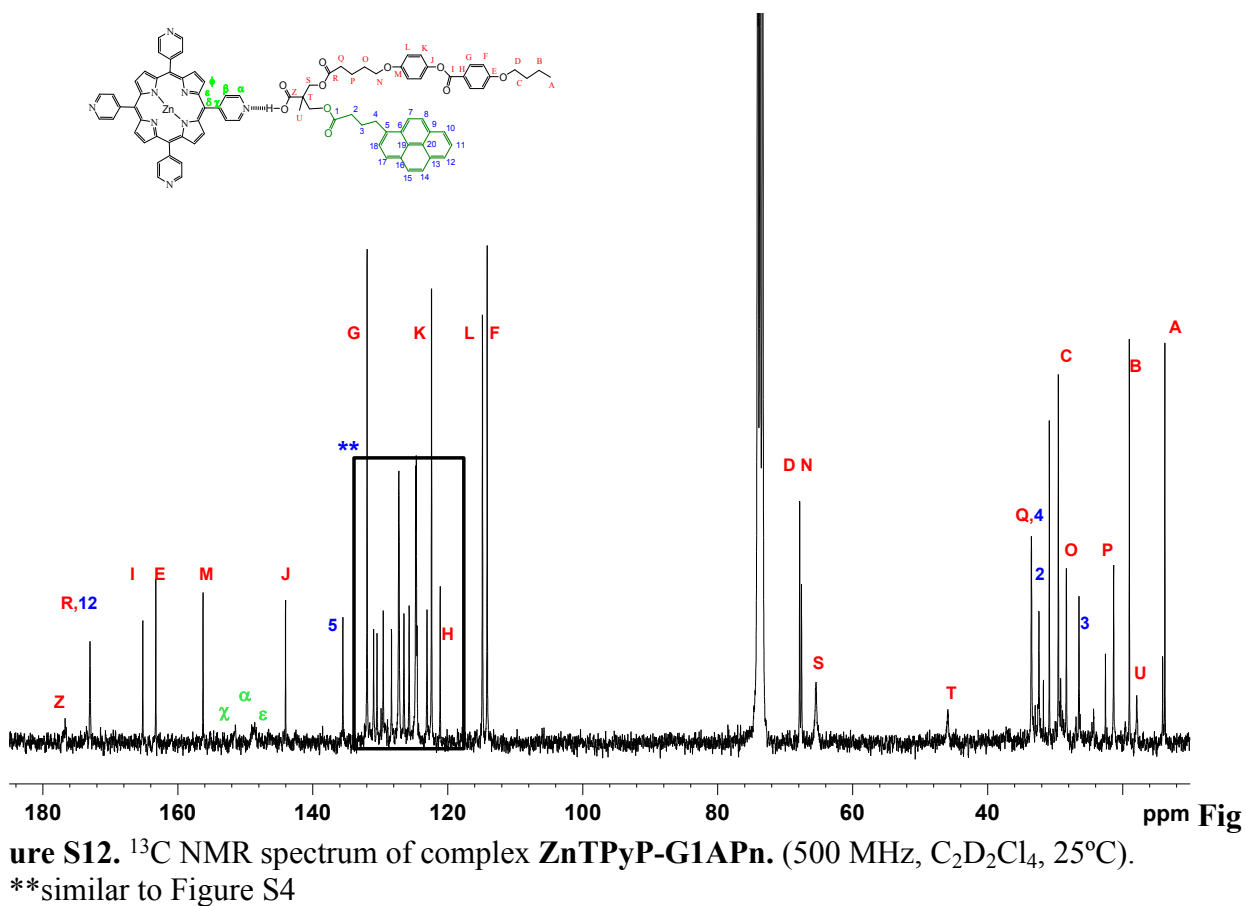

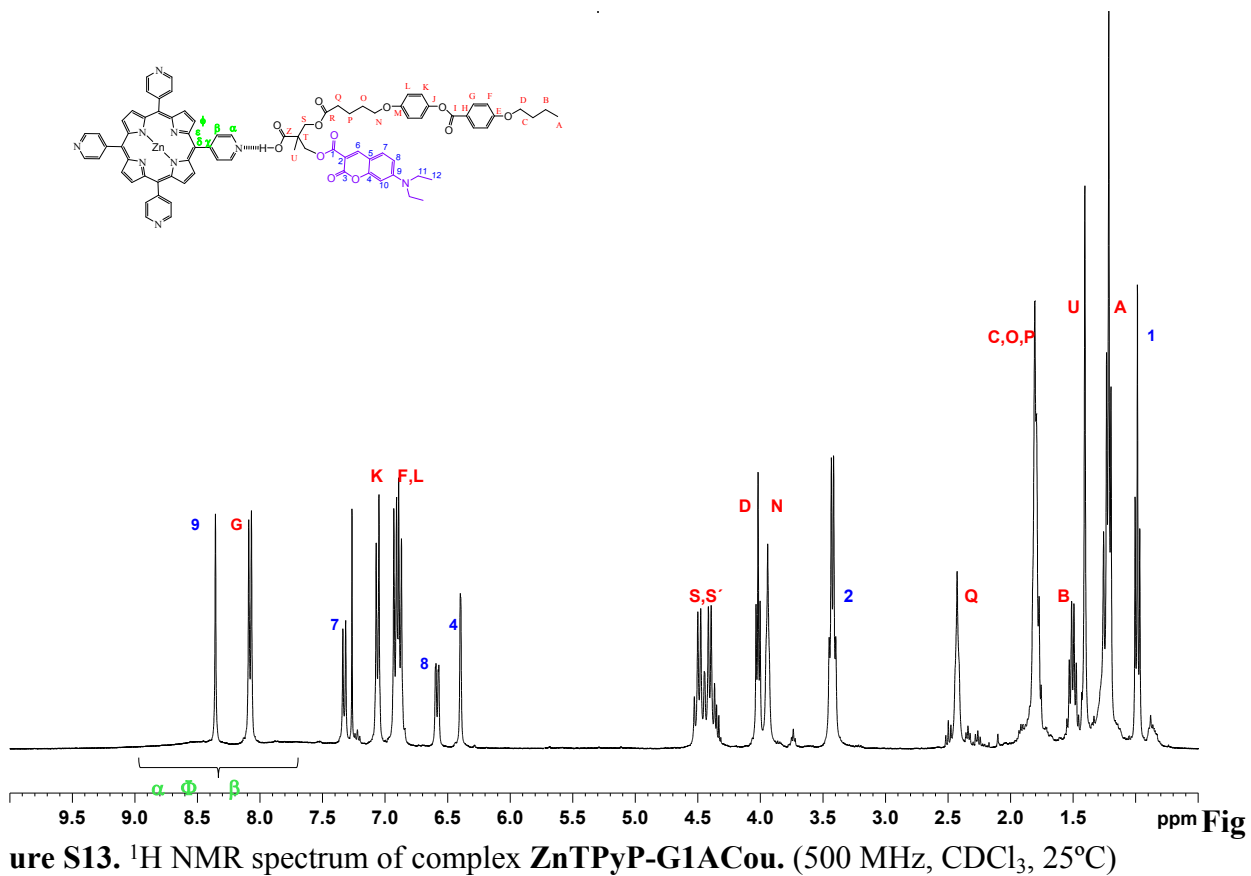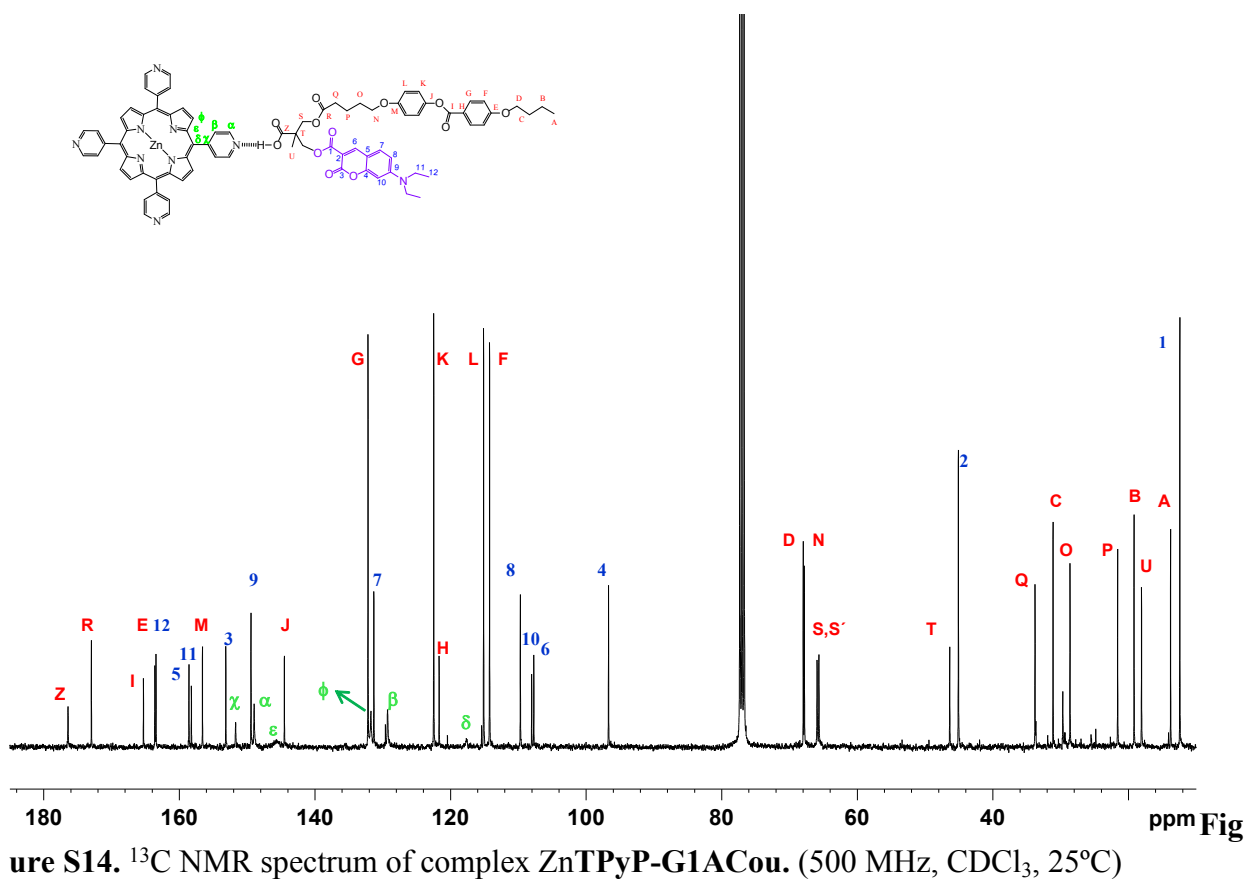

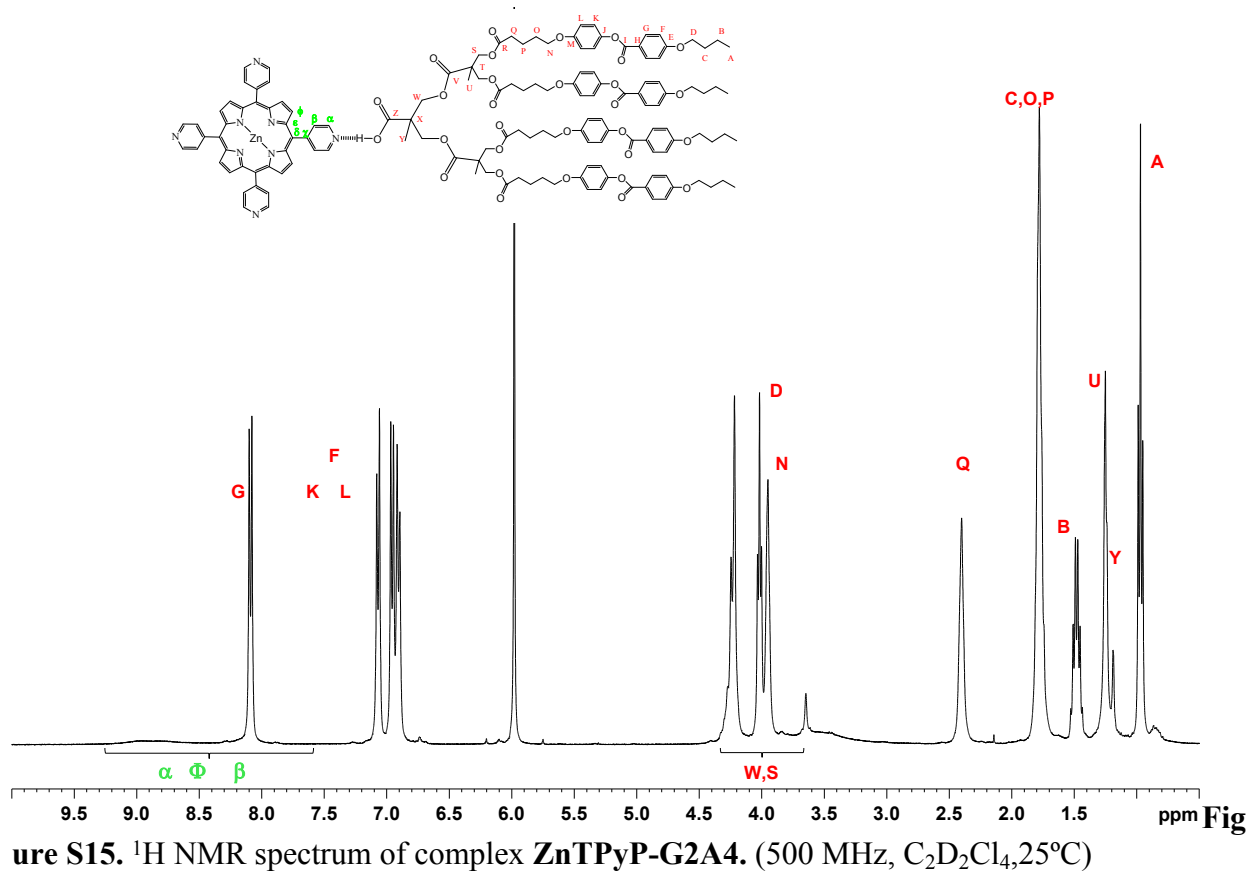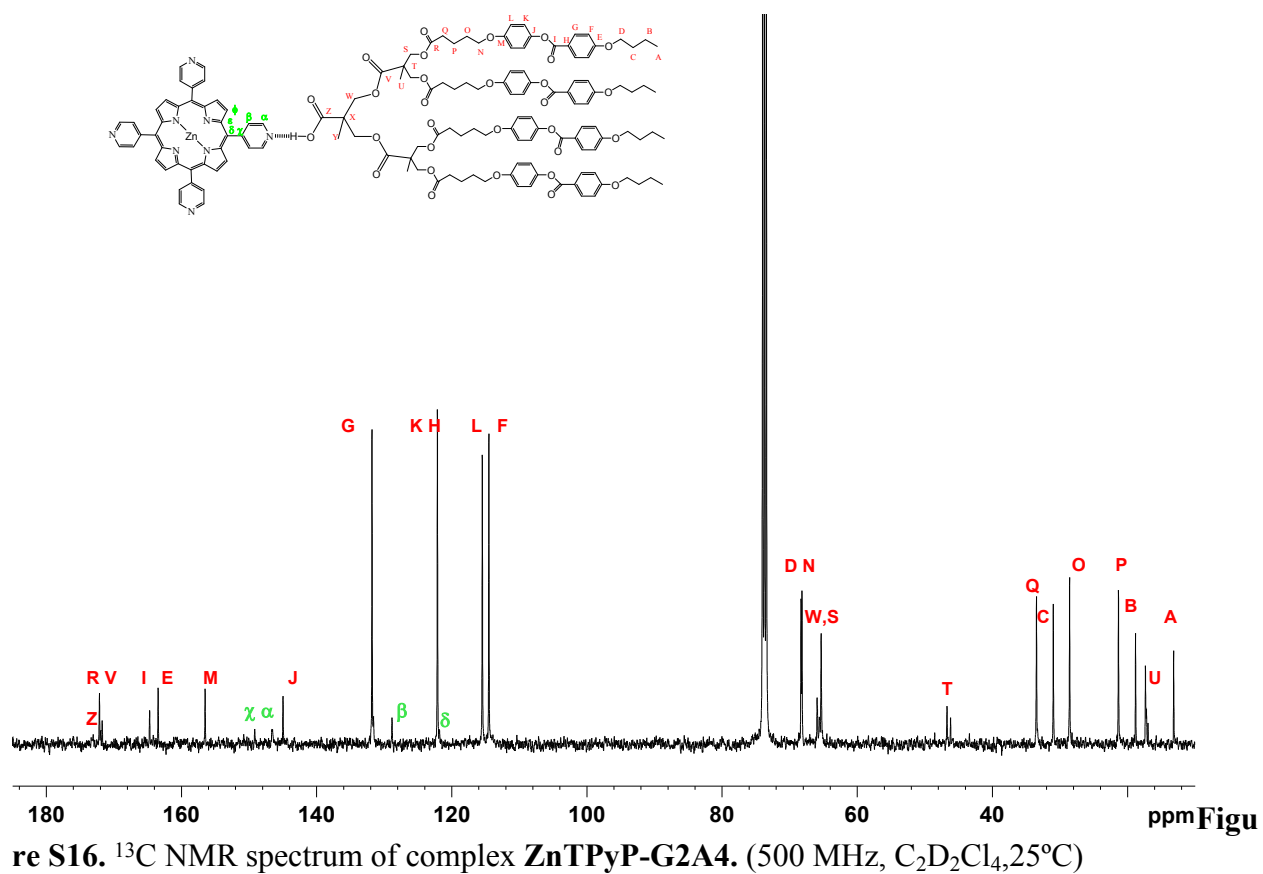



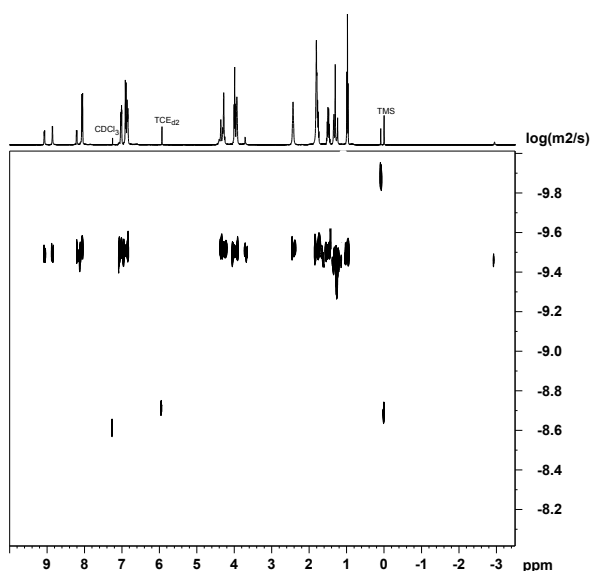

**Figure S17** DOSY spectrum ( $C_2D_2Cl_4$ , at 25 °C) showing chemical shifts versus diffusion coefficient (logarithmic scale) for complex **TPyP-G2A4**.

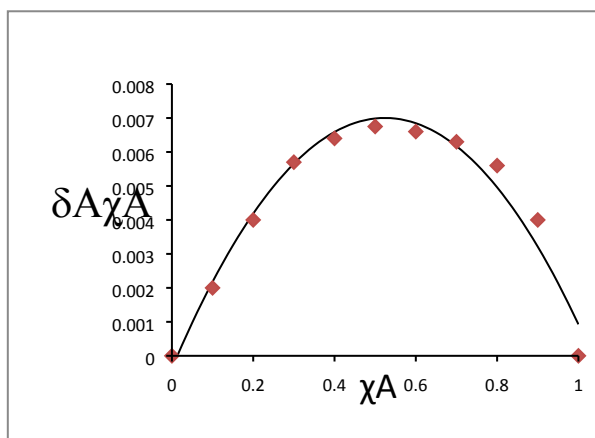

**Figure S18.** Job's plot experiment for the formation of complex between **TPYP** and **Ac-G1A2** in  $C_2D_2Cl_4$ .  $^1H$  NMR spectra were obtained for a series of solutions in which the total concentration of the two species was maintained constant.

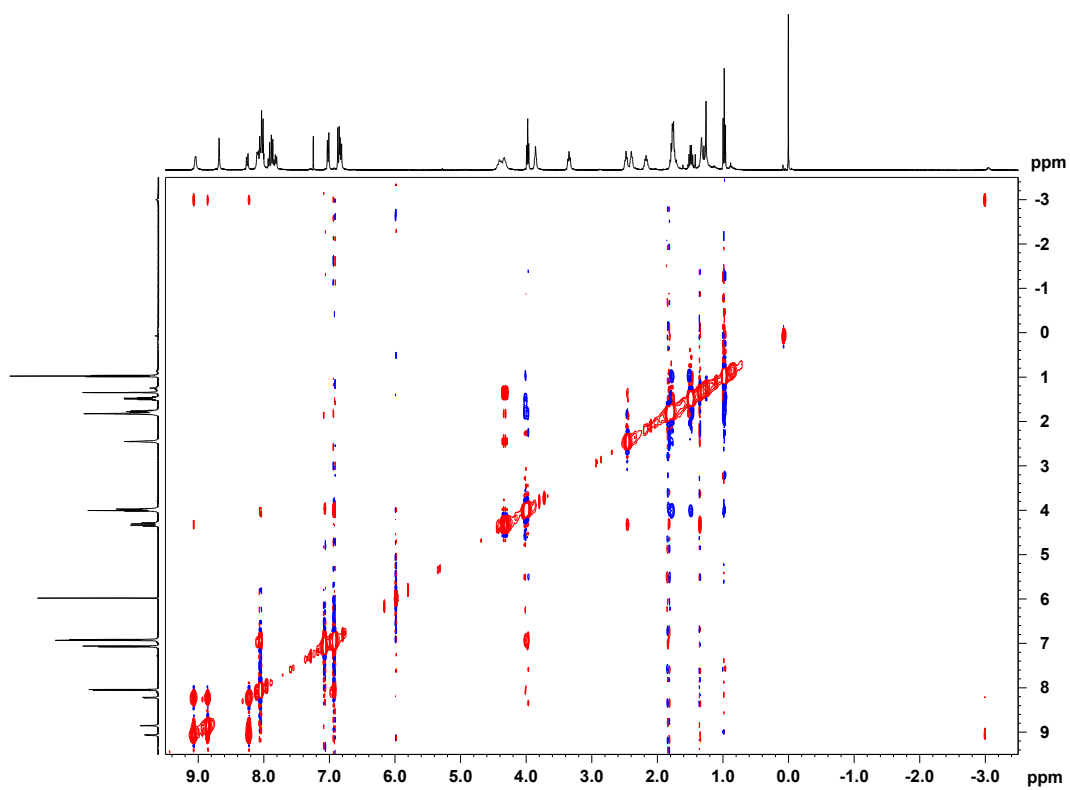

**Figure. S19.**  $^1\text{H}$ - $^1\text{H}$  NOESY spectrum for the complex **TPyP-G1A2**. (500 MHz,  $\text{CDCl}_3$ , 25°C),  $t_{\text{mix}} = 800$  ms.

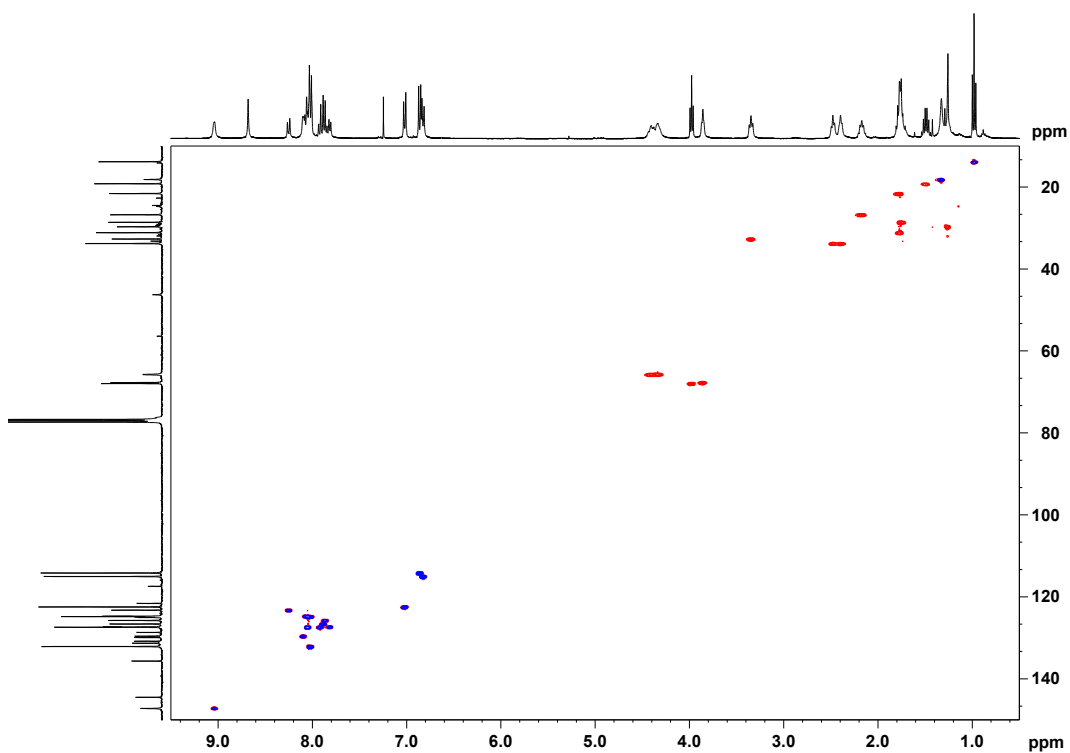

**Figure S20.**  $^1\text{H}$ - $^{13}\text{C}$  HSQC spectrum of complex **TPyP-G1A2**. (500 MHz,  $\text{CDCl}_3$ , 25°C)

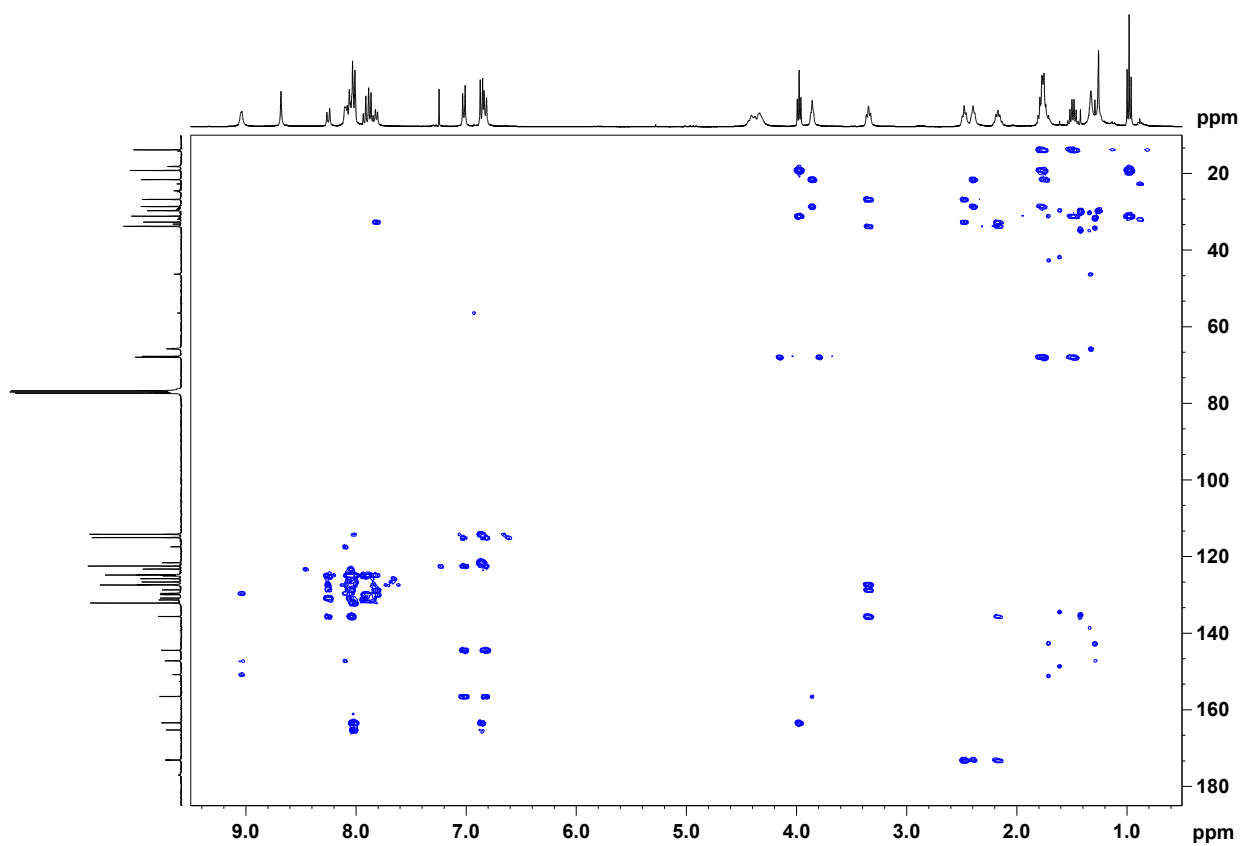

**Figure S21.**  $^1\text{H}$ - $^{13}\text{C}$  HMBC spectrum of complex **TPyP-G1APn**. (500 MHz,  $\text{CDCl}_3$ , 25°C)

## DSC traces, POM textures and XRD pattern

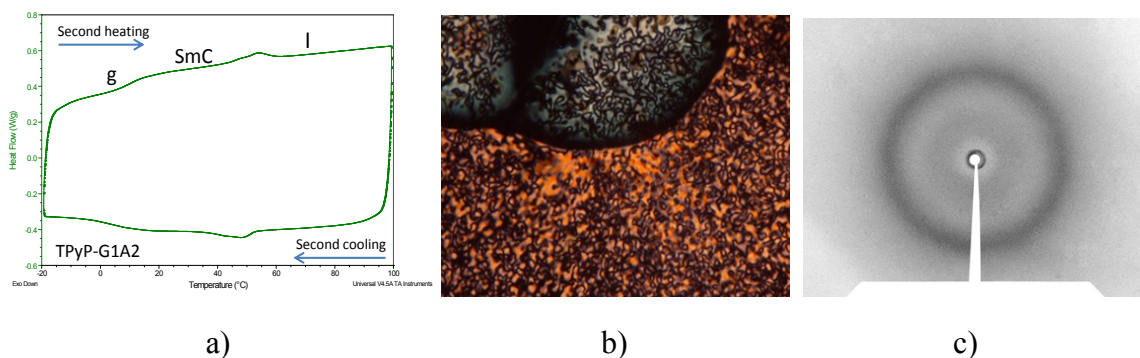

**Figure S22.** **a)** DSC traces of compound **TPyP-G1A2** at a heating and cooling rate of  $10\text{ }^{\circ}\text{C min}^{-1}$ ; g: glass, SmC: smectic C mesophase, I: isotropic liquid. **b)** Microphotographs of optical texture for **TPyP-G1A2** taken at  $46\text{ }^{\circ}\text{C}$  in the cooling process from the isotropic phase observed under the polarizing microscope, (magnification  $\times 50$ ). **c)** Room temperature XRD pattern of **TPyP-G1A2** in the SmC mesophase.

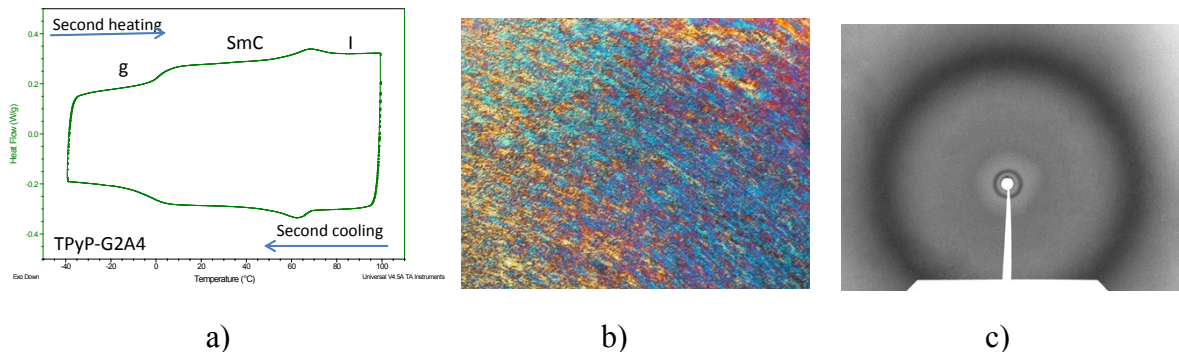

**Figure S23.** **a)** DSC traces of compound **TPyP-G2A4** at a heating and cooling rate of  $10\text{ }^{\circ}\text{C min}^{-1}$ ; g: glass, SmC: smectic C mesophase, I: isotropic liquid. **b)** Microphotographs of optical texture for **TPyP-G2A4** taken at  $30\text{ }^{\circ}\text{C}$  in the cooling process from the isotropic phase observed under the polarizing microscope, (magnification  $\times 50$ ). **c)** Room temperature XRD pattern of **TPyP-G2A4** in the SmC mesophase.

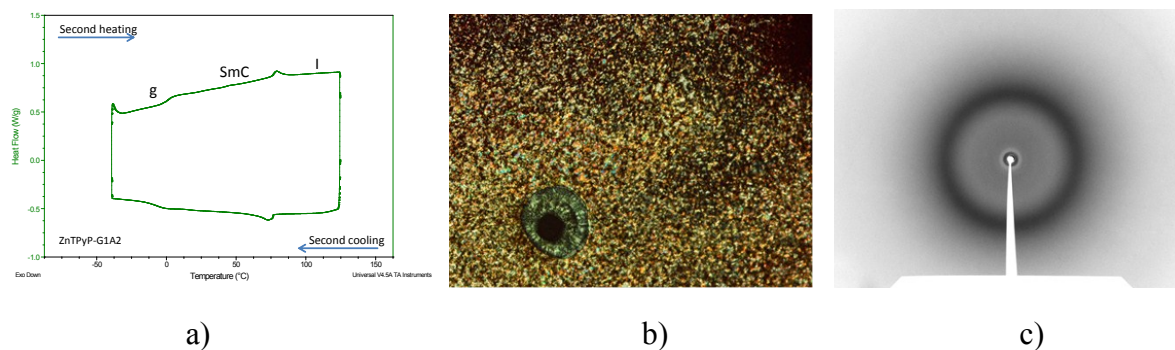

**Figure S24.** a) DSC traces of compound **ZnTPyP-G1A2** at a heating and cooling rate of  $10\text{ }^{\circ}\text{C min}^{-1}$ ; g: glass, SmC: smectic C mesophase, I: isotropic liquid. b) Microphotographs of optical texture for **ZnTPyP-G1A2** taken at  $29\text{ }^{\circ}\text{C}$  in the cooling process from the isotropic phase observed under the polarizing microscope (magnification  $\times 20$ ). c) Room temperature XRD pattern of **ZnTPyP-G1A2** in the SmC mesophase.

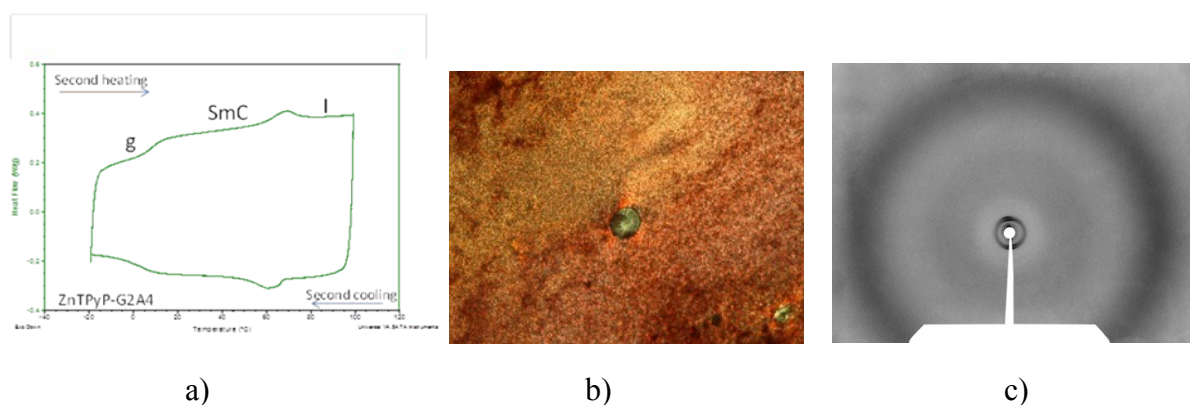

**Figure S25.** a) DSC traces of compound **ZnTPyP-G2A4** at a heating and cooling rate of  $10\text{ }^{\circ}\text{C min}^{-1}$ ; g: glass, SmC: smectic C mesophase, I: isotropic liquid b) Microphotographs of optical texture for **ZnTPyP-G2A4** taken at  $58\text{ }^{\circ}\text{C}$  in the cooling process from the isotropic phase observed under the polarizing microscope (magnification  $\times 20$ ). c) Room temperature XRD pattern of **ZnTPyP-G2A4** in the SmC mesophase.

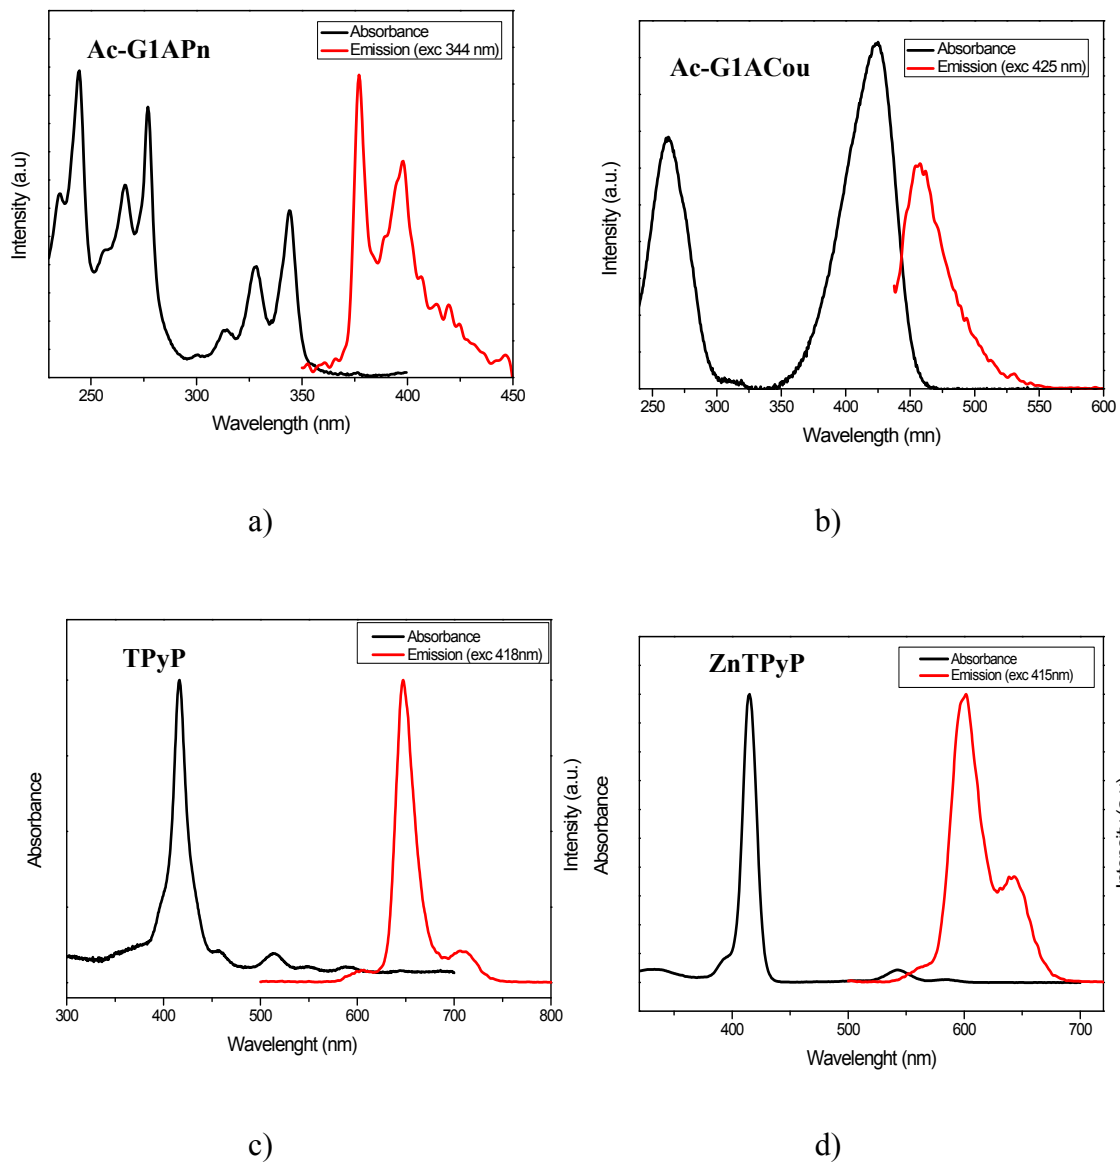

**Figure S26.** Absorption and fluorescence spectra in solution ( $\text{CH}_2\text{Cl}_2$ ) of building blocks: **a)** Ac-G1APn, **b)** Ac-G1ACou, **c)** TPyP and **d)** Zn-TPyP.
